# Supplementary material
Source: Springer Nature journal article supplement (https://www.springermedizin.de/resource/supplementary/12967_2009_444_MOESM2_ESM.pdf/9576544)
Supplement: MOESM2 [file 9576544]

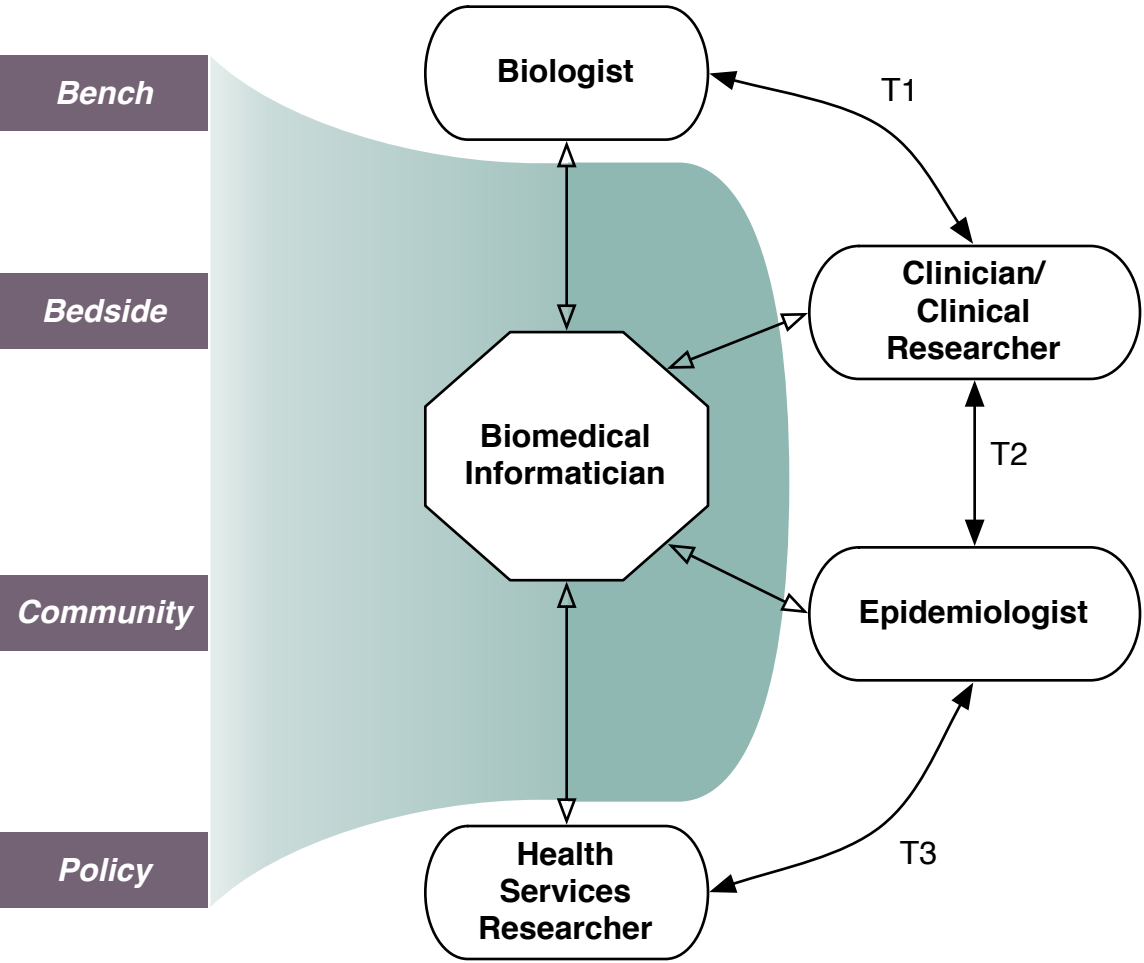

*Bench*

*Bedside*

*Community*

*Policy*

**Biologist**

T1

**Clinician/  
Clinical  
Researcher**

T2

**Epidemiologist**

T3

**Biomedical  
Informatician**

**Health  
Services  
Researcher**
